# Supplementary material for: Targeting LINC00152 activates cAMP/Ca2+/ferroptosis axis and overcomes tamoxifen resistance in ER+ breast cancer
Source: PubMed Central journal article supplement (PMC11180193; doi:10.1038/s41419-024-06814-3), 2024-06-15

**Fig. 2K**

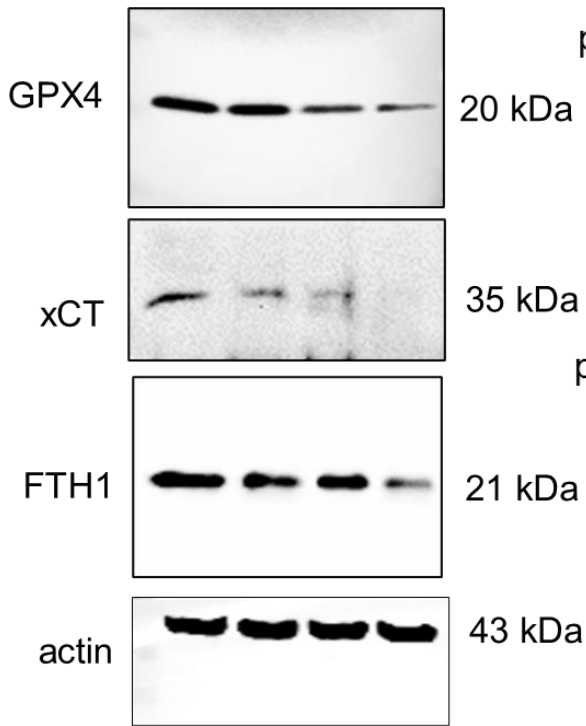

**Fig. 3I**

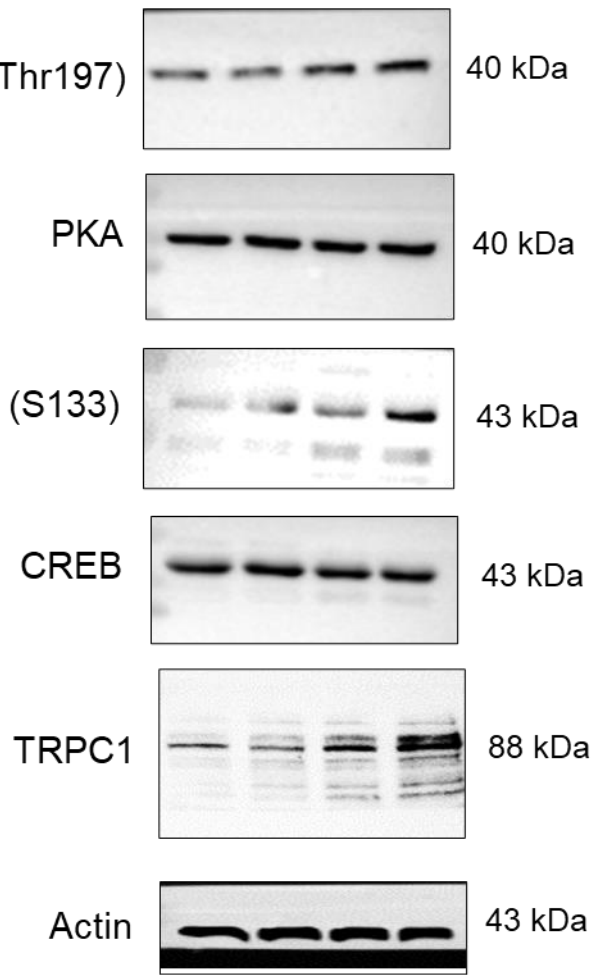

**Fig. 4B**

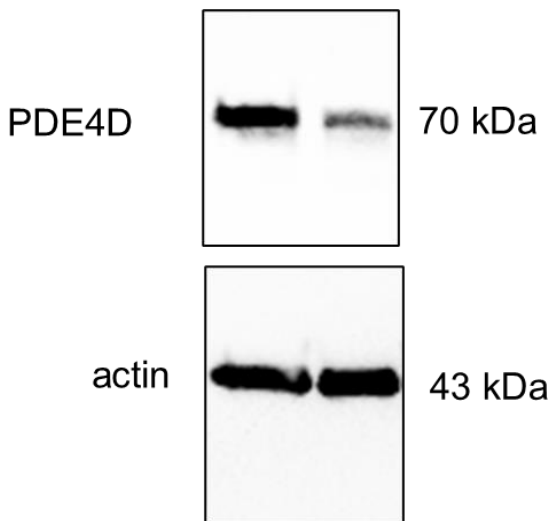

**Fig. 4C**

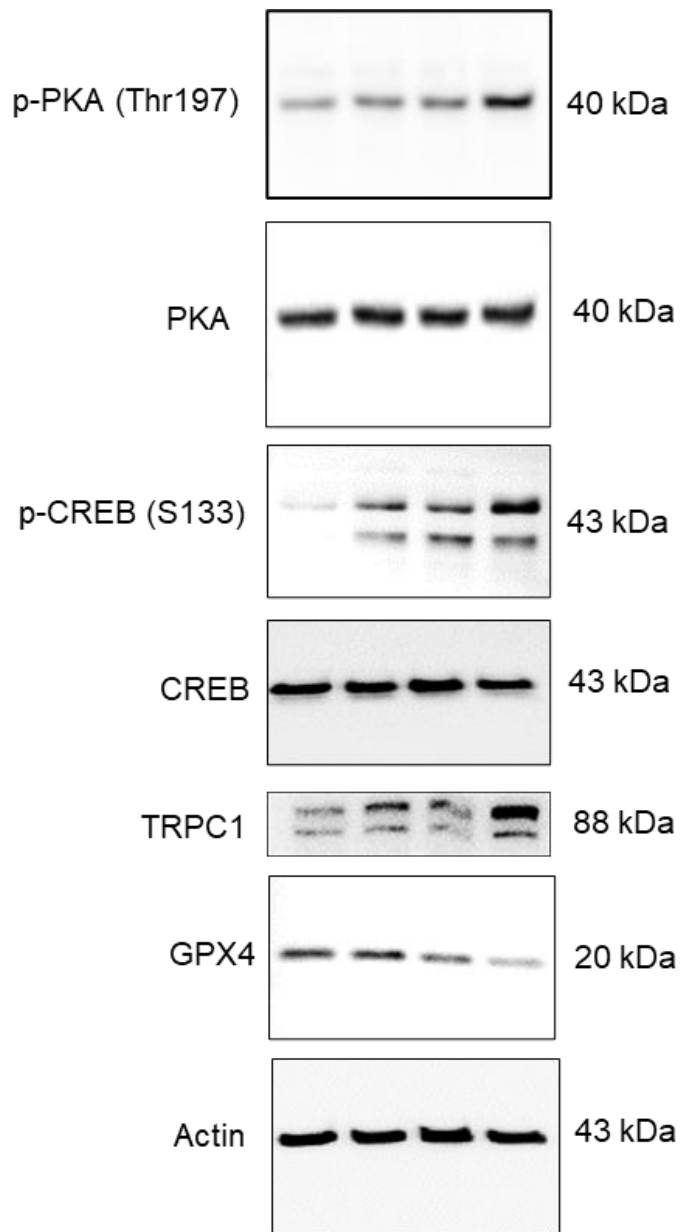

**Fig. 4H**

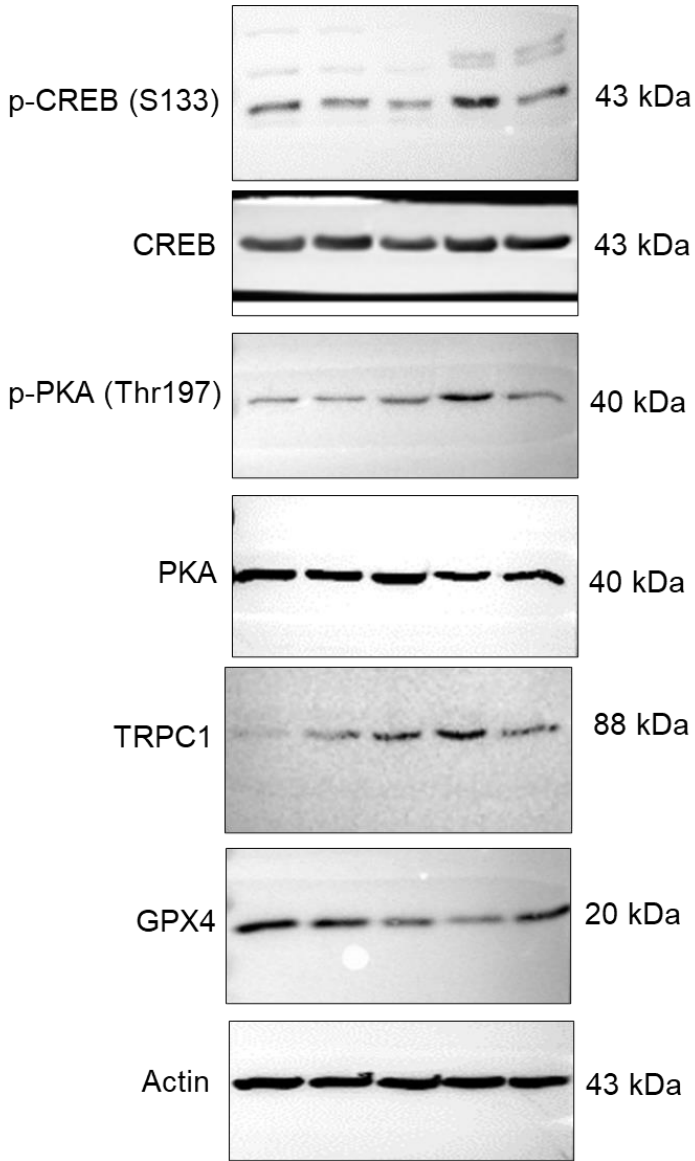

**Fig. S5A**

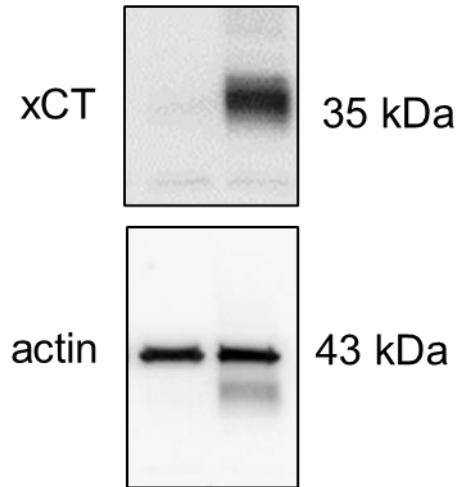

**Fig. S5B**

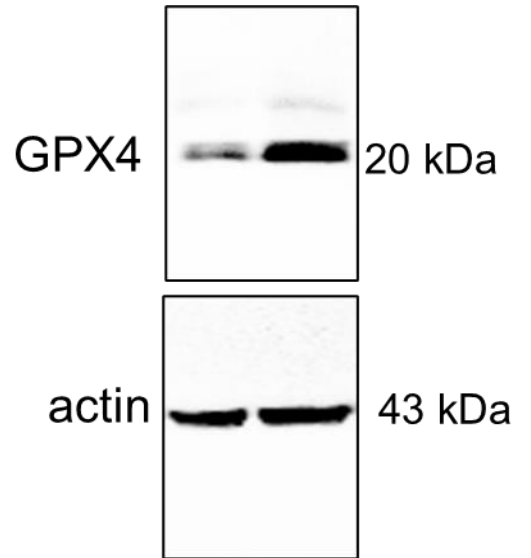

**Fig. S5E**

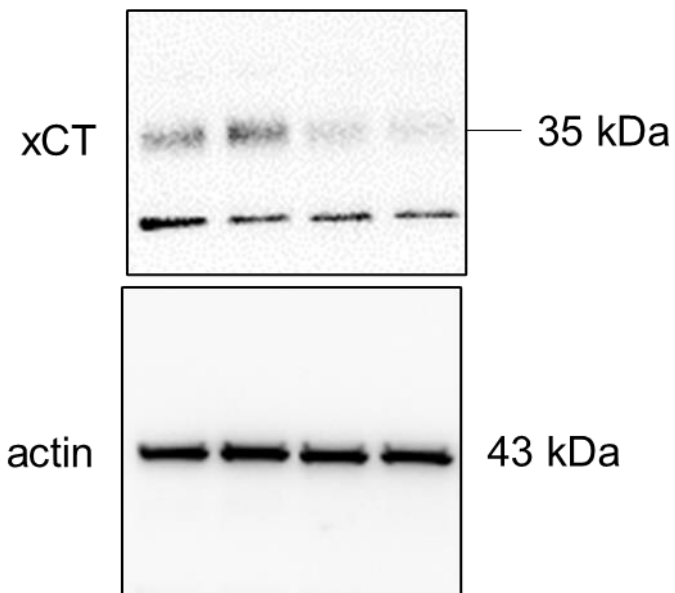

**Fig. S5F**

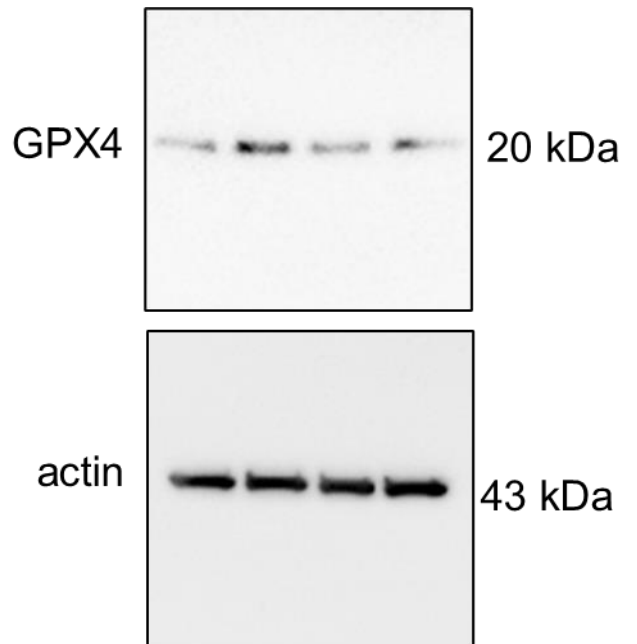

**Fig. S6D**

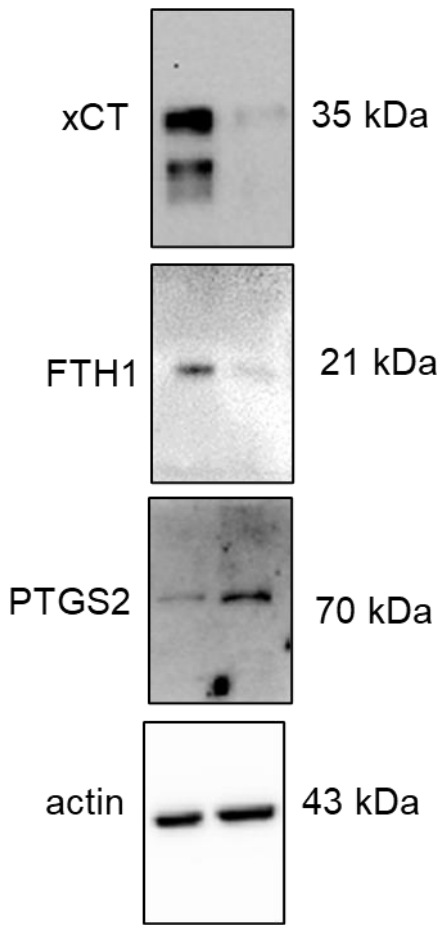

**Fig. S7D**

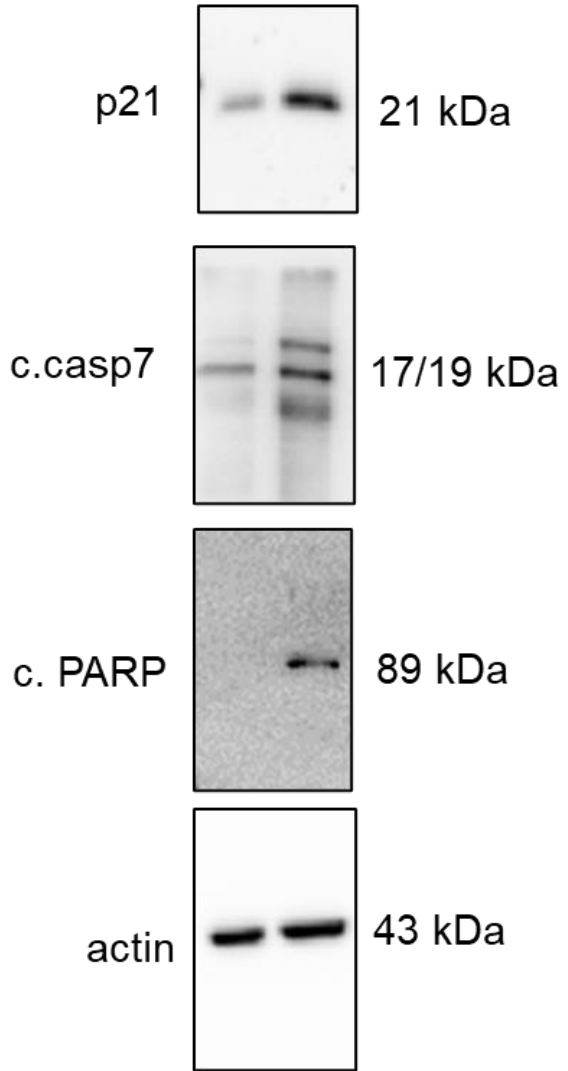

**Fig. S8B**

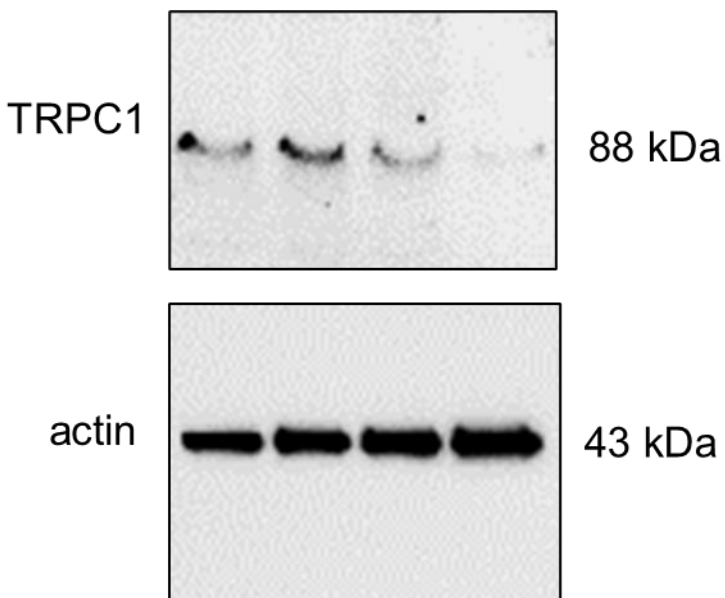

**Fig. S8D**

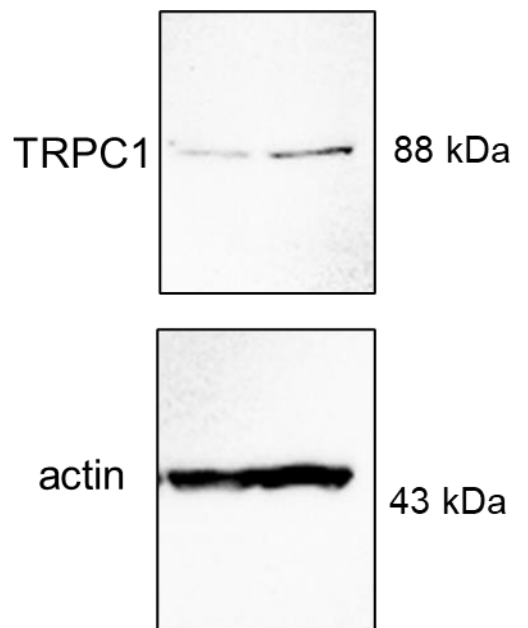

**Fig. S8E**

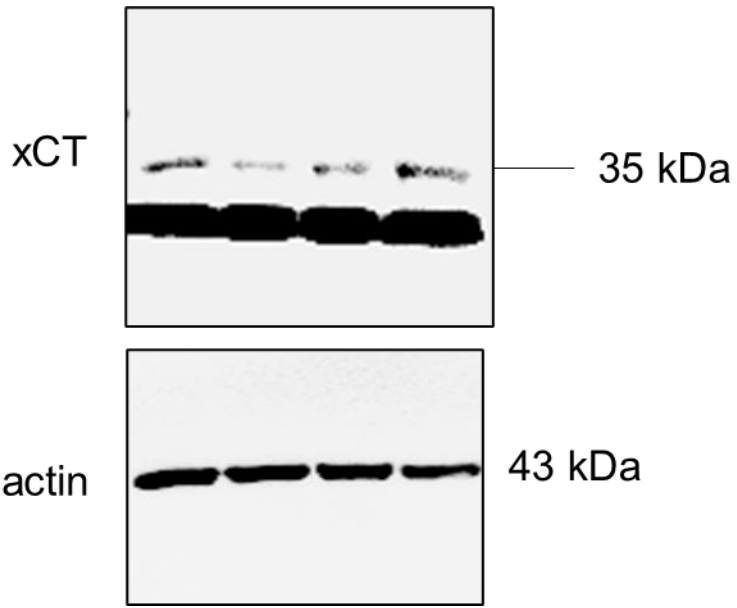

**Fig. S8F**

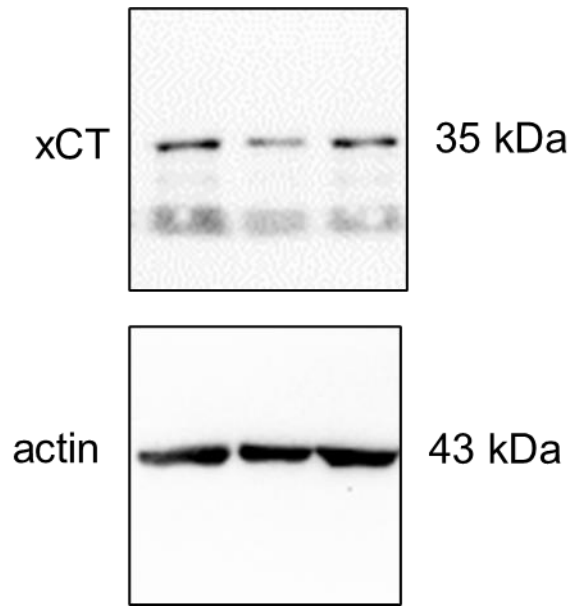

**Fig. S9C**

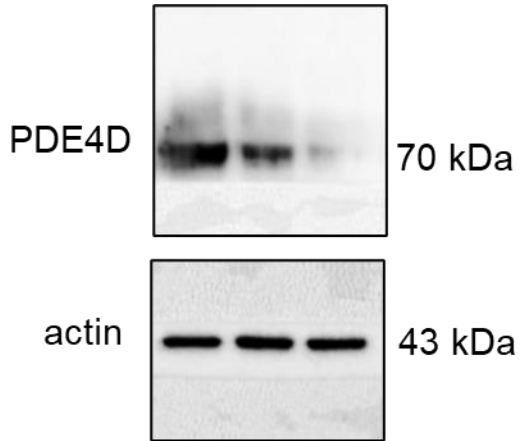

**Fig. S9E**

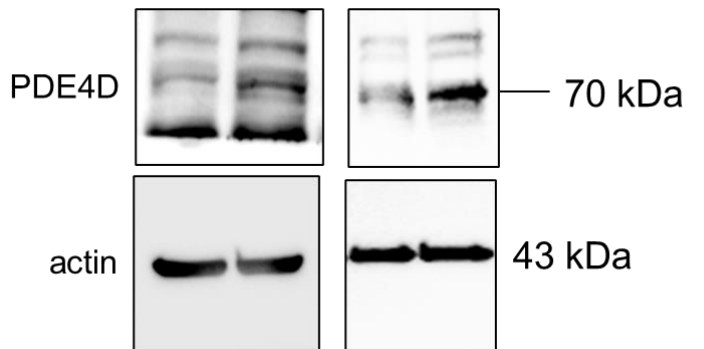

Supplement: 41419_2024_6814_MOESM2_ESM.pdf [file 41419_2024_6814_MOESM2_ESM.pdf]
